# Supplementary material
Source: PubMed Central journal article supplement (PMC8058283)
Supplement: NIHMS1673243-supplement-Supplementary_Material.pdf [file NIHMS1673243-supplement-Supplementary_Material.pdf]

## **Supplementary Material**

### **A comparison of methods in estimating population attributable risk for colorectal cancer in the United States**

Hanseul Kim, Kai Wang, Mingyang Song, Edward L. Giovannucci

**Supplementary Table 1.** Literature-based method: Distribution of exposures in the National Health and Nutrition Examination Survey (NHANES)

**Supplementary Table 2.** Literature-based method: Relative risks for the associations between risk factors and colorectal cancer in the United States

**Supplementary Table 3.** Low-risk method: Characteristics throughout follow-up according to cutoff 7

**Supplementary Table 4.** Additional analysis: Relative risks from studies other than what we used for the literature-based method

**Supplementary Table 5.** Additional analysis: Population attributable risk (PAR) for colorectal cancer using US-specific relative risk (RR)

**Supplementary Table 6.** Additional analysis: Minimum and maximum population attributable risk (PAR) for colorectal cancer in the United States, derived from different sources of prevalence estimates for body fatness and cigarette smoking

**Supplementary Table 7.** Additional analysis: Distribution of exposures from sources other than what we used for the literature-based method

### **Supplementary Methods**

**Supplementary Table 1. Literature-based method: Distribution of exposures in the National Health and Nutrition Examination Survey (NHANES)\***

| Exposure            | Exposure category/unit                        | Prevalence, % |       |
|---------------------|-----------------------------------------------|---------------|-------|
|                     |                                               | Men           | Women |
| Physical activity** | 0-249 MET-m/week                              | 54.8          | 57.9  |
|                     | 250-499 MET-m/week                            | 7.5           | 9.0   |
|                     | 500-749 MET-m/week                            | 4.9           | 6.6   |
|                     | 750-999 MET-m/week                            | 5.9           | 5.4   |
|                     | <b>≥ 1000 MET-m/week</b>                      | 27.1          | 21.1  |
| Body fatness/BMI    | <b>Normal (18.5-&lt; 25 kg/m<sup>2</sup>)</b> | 22.2          | 28.7  |
|                     | Overweight (25-29.9 kg/m <sup>2</sup> )       | 40.9          | 29.6  |
|                     | Obese (≥ 30 kg/m <sup>2</sup> )               | 36.3          | 40.1  |
| Alcohol             | <b>None</b>                                   | 29.4          | 40.7  |
|                     | < 1 drink/day                                 | 32.0          | 37.7  |
|                     | 1-< 4 drinks/day                              | 24.4          | 16.9  |
|                     | ≥ 4 drinks/day                                | 14.4          | 4.8   |
| Red meat            | <b>0-9 g/day</b>                              | 1.1           | 4.8   |
|                     | 10-24 g/day                                   | 9.5           | 30.2  |
|                     | 25-49 g/day                                   | 30.3          | 46.6  |
|                     | 50-74 g/day                                   | 29.5          | 15.6  |
|                     | 75-99 g/day                                   | 17.9          | 2.5   |
|                     | ≥ 100 g/day                                   | 11.7          | 0.3   |
| Processed meat      | <b>0-4 g/day</b>                              | 0.9           | 11.7  |
|                     | 5-24 g/day                                    | 29.4          | 60.0  |
|                     | 25-49 g/day                                   | 41.6          | 22.8  |
|                     | 50-74 g/day                                   | 19.6          | 4.4   |
|                     | ≥ 75 g/day                                    | 8.5           | 1.0   |
| Dietary fiber       | 0-9 g/day                                     | 9.1           | 17.5  |
|                     | 10-19 g/day                                   | 53.2          | 63.3  |
|                     | 20-29 g/day                                   | 30.9          | 17.8  |
|                     | <b>≥ 30 g/day</b>                             | 6.7           | 1.4   |
| Dietary calcium     | 0-199 mg/day                                  | 0.0           | 0.1   |
|                     | 200-399 mg/day                                | 1.3           | 3.8   |
|                     | 400-599 mg/day                                | 7.8           | 16.2  |
|                     | 600-799 mg/day                                | 16.9          | 26.4  |
|                     | 800-999 mg/day                                | 21.3          | 24.4  |
|                     | <b>≥ 1000 mg/day</b>                          | 52.6          | 29.1  |
| Cigarette smoking   | <b>Never</b>                                  | 50.8          | 63.2  |
|                     | Former                                        | 30.2          | 21.8  |
|                     | Current                                       | 19.0          | 15.0  |

\*These were weighted prevalence estimates calculated by Islami et al, 2018<sup>1</sup> for adults ≥30 years. Exposure distribution data on alcohol drinking and cigarette smoking were obtained from the National Health Interview Survey (NHIS). Data on all other exposures were obtained from the NHANES.

\*\*Moderate or vigorous activity.

**Supplementary Table 2. Literature-based method: Relative risks for the associations between risk factors and colorectal cancer in the United States**

|                                | In original reports                                                                                                         |                                |                                                                             | In this analysis when our exposure categories were different from those in original reports |                                                                                                                |                                                   |                                                   |
|--------------------------------|-----------------------------------------------------------------------------------------------------------------------------|--------------------------------|-----------------------------------------------------------------------------|---------------------------------------------------------------------------------------------|----------------------------------------------------------------------------------------------------------------|---------------------------------------------------|---------------------------------------------------|
| Exposure                       | Exposure category/unit                                                                                                      | Region; Study design           | Relative risk (95% CI)                                                      |                                                                                             | Exposure category/unit                                                                                         | Relative risk                                     |                                                   |
|                                |                                                                                                                             |                                | Men                                                                         | Women                                                                                       |                                                                                                                | Men                                               | Women                                             |
| Physical activity <sup>2</sup> | Higher vs. lower (90 <sup>th</sup> percentile vs. 10 <sup>th</sup> percentile)                                              | US and Europe; Pooled analysis | <u>Colon</u> :<br>0.84 (0.77, 0.91)<br><u>Rectum</u> :<br>0.87 (0.80, 0.95) | <u>Colon</u> :<br>0.84 (0.77, 0.91)<br><u>Rectum</u> :<br>0.87 (0.80, 0.95)                 | 0-249 MET-m/week<br>250-499 MET-m/week<br>500-749 MET-m/week<br>750-999 MET-m/week<br><b>≥ 1000 MET-m/week</b> | 1.19<br>1.14<br>1.09<br>1.04<br>Reference         | 1.19<br>1.14<br>1.09<br>1.04<br>Reference         |
| Body fatness/BMI <sup>3</sup>  | <b>Normal (18.5-&lt; 25 kg/m<sup>2</sup>)</b><br>Overweight (25-29.9 kg/m <sup>2</sup> )<br>Obese (≥ 30 kg/m <sup>2</sup> ) | Worldwide; Meta-analysis       | Reference<br>1.17 (1.12, 1.22)<br>1.38 (1.32, 1.44)                         | Reference<br>1.07 (1.01, 1.14)<br>1.17 (1.06, 1.30)                                         | Same                                                                                                           | Same                                              | Same                                              |
| Alcohol <sup>4</sup>           | <b>None</b><br>Light (0.1-12.5 g/day)<br>Moderate (12.6-50 g/day)<br>Heavy (> 50 g/day)                                     | Worldwide; Meta-analysis       | Reference<br>1.05 (0.95, 1.16)<br>1.21 (1.11, 1.32)<br>1.53 (1.30, 1.80)    | Reference<br>0.95 (0.89, 1.01)<br>1.07 (0.99, 1.16)<br>1.24 (0.68, 2.25)                    | <b>None</b><br>< 1 drink/day<br>1-< 4 drinks/day<br>≥ 4 drinks/day                                             | Same                                              | Reference<br>1.00<br>1.07<br>1.24                 |
| Red meat <sup>5</sup>          | Per 100 g/day increase                                                                                                      | Worldwide; Report              | <u>Colon</u> : 1.22<br>(1.06, 1.39)<br><u>Rectum</u> : 1.13<br>(0.96, 1.34) | <u>Colon</u> : 1.22<br>(1.06, 1.39)<br><u>Rectum</u> : 1.13<br>(0.96, 1.34)                 | <b>0-9 g/day</b><br>10-24 g/day<br>25-49 g/day<br>50-74 g/day<br>75-99 g/day<br>≥ 100 g/day                    | Reference<br>1.02<br>1.06<br>1.11<br>1.16<br>1.21 | Reference<br>1.02<br>1.06<br>1.11<br>1.16<br>1.21 |
| Processed meat <sup>5</sup>    | Per 50 g/day increase                                                                                                       | Worldwide; Report              | <u>Colon</u> : 1.23<br>(1.11, 1.35)<br><u>Rectum</u> : 1.08<br>(1.00, 1.18) | <u>Colon</u> : 1.23<br>(1.11, 1.35)<br><u>Rectum</u> : 1.08<br>(1.00, 1.18)                 | <b>0-4 g/day</b><br>5-24 g/day<br>25-49 g/day<br>50-74 g/day<br>≥ 75 g/day                                     | Reference<br>1.04<br>1.13<br>1.23<br>1.33         | Reference<br>1.04<br>1.13<br>1.23<br>1.33         |
| Dietary fiber <sup>5</sup>     | Per 10 g/day increase                                                                                                       | Worldwide; Report              | 0.89 (0.82, 0.96)                                                           | 0.91 (0.87, 0.96)                                                                           | 0-9 g/day<br>10-19 g/day<br>20-29 g/day<br><b>≥ 30 g/day</b>                                                   | 1.42<br>1.26<br>1.12<br>Reference                 | 1.33<br>1.21<br>1.10<br>Reference                 |

|                                |                         |                   |                   |                   |                            |      |      |
|--------------------------------|-------------------------|-------------------|-------------------|-------------------|----------------------------|------|------|
| Dietary calcium <sup>5</sup>   | Per 200 mg/day increase | Worldwide; Report | 0.93 (0.88, 0.99) | 0.93 (0.91, 0.95) | 0-199 mg/day               | 1.44 | 1.44 |
|                                |                         |                   |                   |                   | 200-399 mg/day             | 1.34 | 1.34 |
|                                |                         |                   |                   |                   | 400-599 mg/day             | 1.24 | 1.24 |
|                                |                         |                   |                   |                   | 600-799 mg/day             | 1.16 | 1.16 |
|                                |                         |                   |                   |                   | 800-999 mg/day             | 1.08 | 1.08 |
| <b>≥ 1000 mg/day</b>           | Reference               | Reference         |                   |                   |                            |      |      |
| Cigarette smoking <sup>6</sup> | Never                   | US; Meta-analysis | Reference         | Reference         | Never<br>Former<br>Current | Same | Same |
|                                | Former                  |                   | 1.20 (1.10, 1.30) | 1.20 (1.10, 1.30) |                            |      |      |
|                                | Current                 |                   | 1.40 (1.20, 1.70) | 1.60 (1.40, 1.90) |                            |      |      |

**Supplementary Table 3. Low-risk method: Characteristics\* throughout follow-up according to cutoff 7**

|                                                                | NHS                      |                         | HPFS                     |                         |
|----------------------------------------------------------------|--------------------------|-------------------------|--------------------------|-------------------------|
|                                                                | Cutoff <7<br>(high-risk) | Cutoff ≥7<br>(low-risk) | Cutoff <7<br>(high-risk) | Cutoff ≥7<br>(low-risk) |
| Person-years (% within cohort)                                 | 1,775,750 (95)           | 96,756 (5)              | 936,616 (95)             | 48,843 (5)              |
| Age, years                                                     | 60.7 (11.6)              | 65.5 (11.3)             | 63.9 (11.3)              | 66.7 (11.5)             |
| White, %                                                       | 98                       | 98                      | 94                       | 95                      |
| <b>Physical activity</b>                                       |                          |                         |                          |                         |
| Continuous, min/day                                            | 21.0 (17.6)              | 41.2 (21.2)             | 28.2 (32.7)              | 61.8 (42.2)             |
| Moderate-to-vigorous intensity activity for ≥30 minutes/day, % | 24                       | 76                      | 34                       | 89                      |
| <b>Body mass index</b>                                         |                          |                         |                          |                         |
| Continuous, kg/m <sup>2</sup>                                  | 25.6 (4.6)               | 22.6 (2.4)              | 25.9 (3.3)               | 23.3 (1.9)              |
| ≥18.5 and <25 kg/m <sup>2</sup> , %                            | 54                       | 92                      | 42                       | 92                      |
| <b>Alcohol intake</b>                                          |                          |                         |                          |                         |
| Continuous, g/day                                              | 6.2 (9.4)                | 3.2 (4.1)               | 11.3 (14.0)              | 5.5 (6.5)               |
| <14 (women) or <28 (men) g/day, %                              | 86                       | 99                      | 88                       | 99.6                    |
| <b>Red meat</b>                                                |                          |                         |                          |                         |
| Continuous, serving/day                                        | 0.6 (0.3)                | 0.3 (0.2)               | 0.6 (0.4)                | 0.2 (0.2)               |
| <0.5 serving/day, %                                            | 36                       | 94                      | 47                       | 98                      |
| <b>Processed meat</b>                                          |                          |                         |                          |                         |
| Continuous, serving/day                                        | 0.3 (0.3)                | 0.1 (0.1)               | 0.3 (0.3)                | 0.1 (0.1)               |
| <0.2 serving/day, %                                            | 38                       | 97                      | 40                       | 98                      |
| <b>Dietary fiber</b>                                           |                          |                         |                          |                         |
| Continuous, g/day                                              | 16.2 (4.4)               | 23.2 (4.7)              | 21.6 (5.9)               | 32.2 (7.5)              |
| ≥20 (women) or ≥30 (men) g/day, %                              | 17                       | 85                      | 7                        | 68                      |
| <b>Total calcium intake</b>                                    |                          |                         |                          |                         |
| Continuous, mg/day                                             | 932.1 (339.9)            | 1310.2 (338.4)          | 923.5 (362.0)            | 1291.4 (408.7)          |
| >1,000 mg/day, %                                               | 38                       | 89                      | 32                       | 84                      |
| <b>Cigarette smoking</b>                                       |                          |                         |                          |                         |
| Pack-years**                                                   | 23.7 (20.3)              | 8.8 (12.5)              | 24.6 (19.0)              | 11.0 (12.4)             |
| Never smoking or past smoking with pack-years <5, %            | 54                       | 89                      | 53                       | 92                      |

\*Updated information throughout follow-up was used to calculate the means for continuous variables and percentage for categorical variables. All variables are age-standardized except person-years and age.

\*\*Among ever smokers only

**Supplementary Table 4. Additional analysis: Relative risks from studies other than what we used for the literature-based method**

| Exposure          | Study; Exposure category/unit                                                                                                                                     | Region; Study design     | Relative risk (95% CI)                                                   |                                                                          |
|-------------------|-------------------------------------------------------------------------------------------------------------------------------------------------------------------|--------------------------|--------------------------------------------------------------------------|--------------------------------------------------------------------------|
|                   |                                                                                                                                                                   |                          | Men                                                                      | Women                                                                    |
| Physical activity | Kyu et al, 2016 <sup>7*</sup><br>< 600 MET-m/week<br>600-3999 MET-m/week<br>4000-7999 MET-m/week<br><b>≥ 8000 MET-m/week</b>                                      | Worldwide; Meta-analysis | Reference<br>0.90 (0.85, 0.95)<br>0.83 (0.77, 0.90)<br>0.79 (0.74, 0.85) | Reference<br>0.90 (0.85, 0.95)<br>0.83 (0.77, 0.90)<br>0.79 (0.74, 0.85) |
| Body fatness/BMI  | Calle et al, 2004 <sup>8</sup><br><b>Normal (18.5-&lt; 25 kg/m<sup>2</sup>)</b><br>Overweight (25-29.9 kg/m <sup>2</sup> )<br>Obese (≥ 30 kg/m <sup>2</sup> )     | Worldwide; Review        | Reference<br>1.5<br>2.0                                                  | Reference<br>1.2<br>1.5                                                  |
|                   | Moghaddam et al, 2007 <sup>9</sup><br><b>Normal (18.5-&lt; 25 kg/m<sup>2</sup>)</b><br>Overweight (25-29.9 kg/m <sup>2</sup> )<br>Obese (≥ 30 kg/m <sup>2</sup> ) | Worldwide; Meta-analysis | Reference<br>1.16 (1.07, 1.27)<br>1.40 (1.33, 1.47)                      | Reference<br>1.03 (0.96, 1.10)<br>1.07 (0.97, 1.18)                      |
| Alcohol           | Fedirko et al, 2011 <sup>10</sup><br><b>None</b><br>Light (0.1-12.5 g/day)<br>Moderate (12.6-50 g/day)<br>Heavy (> 50 g/day)                                      | Worldwide; Meta-analysis | Reference<br>1.02 (0.92, 1.14)<br>1.24 (1.13, 1.37)<br>1.62 (1.31, 2.01) | Reference<br>0.95 (0.89, 1.01)<br>1.08 (1.03, 1.13)<br>1.54 (1.04, 2.29) |
| Red meat          | Zhao et al, 2017 <sup>11</sup><br>Per 100 g/day                                                                                                                   | Worldwide; Meta-analysis | 1.16 (1.05, 1.29)                                                        | 1.16 (1.05, 1.29)                                                        |
| Processed meat    | Zhao et al, 2017 <sup>11</sup><br>Per 50 g/day                                                                                                                    | Worldwide; Meta-analysis | 1.22 (1.12, 1.33)                                                        | 1.22 (1.12, 1.33)                                                        |
| Dietary fiber     | Aune et al, 2011 <sup>12</sup><br>Per 10 g/day                                                                                                                    | Worldwide; Meta-analysis | 0.92 (0.82, 1.03)                                                        | 0.94 (0.89, 0.99)                                                        |
| Dietary calcium   | Keum et al, 2014 <sup>13**</sup><br>Per 300 mg/day                                                                                                                | Worldwide; Meta-analysis | 0.92 (0.89, 0.95)                                                        | 0.93 (0.89, 0.96)                                                        |
| Cigarette smoking | Liang et al, 2009 <sup>14</sup><br><b>Never</b><br>Former<br>Current                                                                                              | Worldwide; Meta-analysis | Reference<br>1.20 (1.04, 1.38)<br>1.15 (1.00, 1.32)                      | Reference<br>1.20 (1.04, 1.38)<br>1.15 (1.00, 1.32)                      |

\*Results on colon cancer

\*\*Results on total calcium intake

**Supplementary Table 5. Additional analysis: Population attributable risk (PAR) for colorectal cancer using US-specific relative risk (RR)**

| <b>Exposure*</b>               | <b>Exposure category/unit</b>                                                                  | <b>Worldwide RR (95% CI)</b>                                             | <b>US-specific RR (95% CI)</b>                                           | <b>Worldwide PAR, %</b> | <b>US PAR, %</b> |
|--------------------------------|------------------------------------------------------------------------------------------------|--------------------------------------------------------------------------|--------------------------------------------------------------------------|-------------------------|------------------|
| Body fatness/BMI <sup>15</sup> | <b>Normal</b><br>Obese ( $\geq 30$ kg/m <sup>2</sup> )                                         | Reference<br>1.33 (1.25, 1.42)                                           | Reference<br>1.47 (1.33, 1.62)                                           | 11                      | 15               |
| Alcoholic drink <sup>4</sup>   | <b>None</b><br>Light ( $\leq 12.5$ g/day)<br>Moderate (12.6-50 g/day)<br>Heavy ( $> 50$ g/day) | Reference<br>0.99 (0.95, 1.04)<br>1.17 (1.11, 1.24)<br>1.44 (1.25, 1.65) | Reference<br>0.96 (0.90, 1.03)<br>1.14 (1.05, 1.24)<br>1.29 (1.01, 1.66) | 7                       | 4                |
| Red meat <sup>11</sup>         | Highest vs. Lowest                                                                             | 1.12 (1.03, 1.21)                                                        | 1.07 (0.99, 1.16)                                                        | 1                       | 0                |
| Processed meat <sup>11</sup>   | Highest vs. Lowest                                                                             | 1.15 (1.07, 1.24)                                                        | 1.12 (1.04, 1.21)                                                        | 1                       | 1                |
| Dietary fiber <sup>12</sup>    | Per 10 g/day                                                                                   | 0.90 (0.86, 0.94)                                                        | 0.92 (0.88, 0.96)                                                        | 18                      | 14               |
| Dietary calcium <sup>13</sup>  | Per 300 mg/day**                                                                               | 0.92 (0.89, 0.95)                                                        | 0.93 (0.90, 0.96)                                                        | 6                       | 5                |
|                                |                                                                                                |                                                                          |                                                                          | <b>Total Estimate</b>   |                  |
|                                |                                                                                                |                                                                          |                                                                          | <b>37</b>               | <b>35</b>        |

\*Exposure categories: Body fatness/BMI (Normal, Obese ( $\geq 30$  kg/m<sup>2</sup>)); Alcoholic drink (None, Light ( $\leq 12.5$  g/day), Moderate (12.6-50 g/day), Heavy ( $> 50$  g/day)); Red meat (Highest vs. lowest; 0-9 g/day vs.  $\geq 100$  g/day); Processed meat (Highest vs. lowest; 0-4 g/day vs.  $\geq 75$  g/day); Dietary fiber (0-9 g/day, 10-19 g/day, 20-29 g/day,  $\geq 30$  g/day); Dietary calcium (0-199 mg/day, 200-399 mg/day, 400-599 mg/day, 600-799 mg/day, 800-999 mg/day,  $\geq 1000$  mg/day)

\*\*Results on total calcium intake

**Supplementary Table 6. Additional analysis: Minimum and maximum population attributable risk (PAR) for colorectal cancer in the United States, derived from different sources of prevalence estimates for body fatness and cigarette smoking**

| Exposure*             | (Minimum PAR, Maximum PAR), % |                 |
|-----------------------|-------------------------------|-----------------|
|                       | Men                           | Women           |
| Physical activity     | 10                            | 11              |
| Body fatness/BMI      | (16, 17)                      | (7, 8)          |
| Alcoholic drinks      | 13                            | 2               |
| Red meat              | 9                             | 5               |
| Processed meat        | 12                            | 6               |
| Dietary fiber         | 18                            | 17              |
| Dietary calcium       | 6                             | 10              |
| Cigarette smoking     | (12, 16)                      | (12, 16)        |
| <b>Total estimate</b> | <b>(64, 67)</b>               | <b>(53, 56)</b> |

\*Exposure categories same as Table 2



**Supplementary Table 7. Additional analysis: Distribution of exposures from sources other than what we used for the literature-based method\***

| Exposure          | Source; Exposure category/unit          | Prevalence, % |       |
|-------------------|-----------------------------------------|---------------|-------|
|                   |                                         | Men           | Women |
| Body fatness/BMI  | NCD-RisC, 2016                          |               |       |
|                   | Overweight (25-29.9 kg/m <sup>2</sup> ) | 38.1          | 26.6  |
|                   | Obese (≥ 30 kg/m <sup>2</sup> )         | 36.5          | 38.2  |
|                   | WHO Global InfoBase, 2016               |               |       |
|                   | Overweight (25-29.9 kg/m <sup>2</sup> ) | 37.2          | 26.2  |
|                   | Obese (≥ 30 kg/m <sup>2</sup> )         | 35.5          | 37.0  |
| Cigarette smoking | BRFSS, 2018                             |               |       |
|                   | Overweight (25-29.9 kg/m <sup>2</sup> ) | 40.5          | 29.5  |
|                   | Obese (≥ 30 kg/m <sup>2</sup> )         | 30.6          | 31.3  |
| Cigarette smoking | NHANES <sup>16**</sup>                  |               |       |
|                   | Never                                   | 27.7          | 56.6  |
|                   | Former                                  | 47.6          | 25.8  |
|                   | Current                                 | 24.6          | 24.2  |

\*Note that prevalence estimates for standard calculations (Supplementary Table 1) were weighted prevalence estimates from NHANES except for alcohol drinking and cigarette smoking that were obtained from the National Health Interview Survey (NHIS). (Islami et al, 2018<sup>1</sup>)

\*\*Prevalence estimates were calculated among adults aged 50 to 74. Never-smoker was defined as those having smoked <100 cigarettes in their lifetime.

## Supplementary Methods

### Assumptions for each of the factors

#### *Physical activity*

For the literature-based method, we used relative risk (RR) from a pooled analysis of the US and European studies that examined physical activity<sup>2</sup>. Hazard ratios (HRs) were used to estimate RRs. In their supplementary figure, the authors presented HRs stratified by sex. However, we did not use the stratified values because P for heterogeneity by sex was  $>0.05$  for colon cancer and rectal cancer. As there is ~70% colon cancer and ~30% rectal cancer<sup>17</sup>, we took a weighted average of colon cancer and rectal cancer to calculate the RR for CRC:  $0.84*0.70 + 0.87*0.30 = 0.849$ . The non-BMI adjusted HR was 0.849 for 90<sup>th</sup> versus 10<sup>th</sup> percentile (i.e., highest vs. lowest category). The median and interquartile range of 6 of the 7 cohorts included was 8 (2-22) MET-hours/week. Therefore, for our physical activity categories (0-249, 250-499, 500-749, 750-999,  $\geq 1000$  MET-m/week), we assumed that the HR of 0.849 could be used for the RR comparing  $\geq 1000$  MET-m/week category to 0-249 MET-m/week (reference) category.

For each of the categories, we calculated the RRs: 0-249 MET-m/week:  $1/0.849$ ; 250-499 MET-m/week:  $\text{EXP}(\text{LN}(0.849)/1000*250)/0.849$ ; 500-749 MET-m/week:  $\text{EXP}(\text{LN}(0.849)/1000*500)/0.849$ ; 750-999 MET-m/week:  $\text{EXP}(\text{LN}(0.849)/1000*750)/0.849$ ;  $\geq 1000$  MET-m/week: 1

#### *Body fatness/body mass index (BMI)*

According to the WCRF/AICR report<sup>5</sup>, there was a significant non-linear dose-response relationship for BMI. We used a meta-analysis of studies for BMI that stratified by sex<sup>3</sup>. There were 12 cohorts from all over the world, and 5 out of 12 cohorts were from the US.

#### *Alcohol intake*

According to the WCRF/AICR report<sup>5</sup>, there was a significant non-linear dose-response relationship for alcohol intake. We used a dose response meta-analysis of 66 studies from the world and 27 studies were from North America<sup>4</sup>.

#### *Red meat and processed meat intakes*

We used a dose-response meta-analysis from the WCRF/AICR report for red meat and processed meat intakes<sup>5</sup>. For robustness, we used studies for colon cancer and studies for rectal cancer, separately, not studies that looked at combined CRC. As there is ~70% colon cancer and ~30% rectal cancer<sup>17</sup>, we took a weighted average of colon cancer and rectal cancer to calculate the RR for CRC.

For red meat, there was no sex-specific RR reported. We assumed that there is no heterogeneity by sex. There were 11 studies for colon cancer (summary RR = 1.22 per 100 g/day) and 8 studies for rectal cancer (summary RR = 1.13 per 100 g/day). For the RR of CRC, we calculated the weighted average:  $1.22*0.70 + 1.13*0.30 = 1.193$ . For each of the categories, we calculated the RRs: 0-9 g/day: 1; 10-24 g/day:  $\text{EXP}(\text{LN}(1.193)/100*12.5)$ ; 25-49 g/day:  $\text{EXP}(\text{LN}(1.193)/100*32.5)$ ; 50-74 g/day:  $\text{EXP}(\text{LN}(1.193)/100*57.5)$ ; 75-99 g/day:  $\text{EXP}(\text{LN}(1.193)/100*82.5)$ ;  $\geq 100$  g/day:  $\text{EXP}(\text{LN}(1.193)/100*107.5)$

For processed meat, there was no sex-specific RR reported. We assumed that there is no heterogeneity by sex. There were 12 studies for colon cancer (summary RR = 1.23 per 50 g/day) and 10 studies for rectal cancer (summary RR = 1.08 per 50 g/day). For the RR of CRC, we calculated the weighted average:  $1.23*0.70 + 1.08*0.30 = 1.185$ . For each of the categories, we calculated the RRs: 0-4 g/day: 1; 5-24 g/day:  $\text{EXP}(\text{LN}(1.185)/50*12.5)$ ; 25-49 g/day:  $\text{EXP}(\text{LN}(1.185)/50*35)$ ; 50-74 g/day:  $\text{EXP}(\text{LN}(1.185)/50*60)$ ;  $\geq 75$  g/day:  $\text{EXP}(\text{LN}(1.185)/50*85)$

### ***Fiber intake***

We used a dose-response meta-analysis from the WCRF/AICR report for dietary fiber intake<sup>5</sup>. There were 6 studies for men and 11 studies for women.

For each of the categories, we calculated the RRs:

For men: 0-9 g/day:  $1/\text{EXP}(\text{LN}(0.89)/10*30)$ ; 10-19 g/day:  $0.89/\text{EXP}(\text{LN}(0.89)/10*30)$ ; 20-29 g/day:  $\text{EXP}(\text{LN}(0.89)/10*20)/\text{EXP}(\text{LN}(0.89)/10*30)$ ;  $\geq 30$  g/day: 1

For women: 0-9 g/day:  $1/\text{EXP}(\text{LN}(0.91)/10*30)$ ; 10-19 g/day:  $0.91/\text{EXP}(\text{LN}(0.91)/10*30)$ ; 20-29 g/day:  $\text{EXP}(\text{LN}(0.91)/10*20)/\text{EXP}(\text{LN}(0.91)/10*30)$ ;  $\geq 30$  g/day: 1

### ***Calcium intake***

We used a dose-response meta-analysis from the WCRF/AICR report for dietary calcium intake<sup>5</sup>. There were 3 studies for men and 9 studies for women.

For each of the categories, we calculated the RRs: 0-199 mg/day:  $1/\text{EXP}(\text{LN}(0.93)/200*1000)$ ; 200-399 mg/day:  $0.93/\text{EXP}(\text{LN}(0.93)/200*1000)$ ; 400-599 mg/day:  $\text{EXP}(\text{LN}(0.93)/200*400)/\text{EXP}(\text{LN}(0.93)/200*1000)$ ; 600-799 mg/day:  $\text{EXP}(\text{LN}(0.93)/200*600)/\text{EXP}(\text{LN}(0.93)/200*1000)$ ; 800-999 mg/day:  $\text{EXP}(\text{LN}(0.93)/200*800)/\text{EXP}(\text{LN}(0.93)/200*1000)$ ;  $\geq 1000$  mg/day: 1

### ***Cigarette smoking***

We used a meta-analysis of US studies for cigarette smoking<sup>6</sup>. There were 3 cohorts for men and 4 cohorts for women.

### **Details on the low-risk method**

We used the Nurses' Health Study (NHS) and Health Professionals Follow-up Study (HPFS) for the low-risk method, which are two ongoing US cohorts that enrolled 121,700 registered female nurses aged 30 to 55 years in 1976<sup>18</sup> and 51,529 male health professionals aged 40 to 75 years in 1986<sup>19</sup>, respectively. In both cohorts, participants completed a detailed questionnaire about their lifestyle and medical information at baseline and every two years thereafter with over 90% of follow-up. This study was approved by the institutional review boards of the Brigham and Women's Hospital and Harvard T.H. Chan School of Public Health, and those of participating registries as required.

Participants also provided dietary information through validated food frequency questionnaires (FFQs) every 4 years. Among participants who returned the baseline questionnaires (1980 for the NHS and 1986 for the HPFS, when we first collected detailed dietary and lifestyle information), we excluded those who had a history of cancer (except nonmelanoma skin cancer), or ulcerative colitis; with a BMI of  $<18.5$  kg/m<sup>2</sup>; reported implausible energy intakes ( $<500$  or  $>3500$  kcal/d for women;  $<800$  or  $>4200$  kcal/d for men); or with missing data on lifestyle exposures. After these exclusions, 60,275 women and 41,544 men were included in the analysis.

Height, body weight, cigarette smoking, and physical activity were self-reported through biennial questionnaires. Cigarette smoking was evaluated based on both pack-years and the current status that was reported biennially. Physical activity was assessed by the total hours per week for moderate-to-vigorous intensity activity (including brisk walking) that requires the expenditure of at least 3 metabolic equivalents per hour. Alcohol use and diet were self-reported every 4 years by the FFQs.

In the cohorts, we calculated person-years of follow-up for each participant from the date of returning the baseline questionnaire until the date of CRC diagnosis, death, loss to follow-up, or end of follow-up (June 30, 2014, for the NHS and January 31, 2014, for the HPFS), whichever came first.

To transform servings to grams for red and processed meat, we used the following formula:

Grams of red meat = sum of (Beef, pork or lamb as a sandwich in servings/day)\*84.54, (Beef or lamb as a main dish in servings/day)\*140, (Pork as a main dish in servings/day)\*140.78, (Hamburger, regular in servings/day)\*85, and (Hamburger, lean in servings/day)\*85

Grams of processed meat= sum of (Bacon in servings/day)\*16, (Hot dogs in servings/day)\*46.05, (Salami, bologna sandwich in servings/day)\*56, (Chicken or turkey hot dogs or sausage in servings/day)\*50.72, and (Other Processed meats in servings/day)\*54

### **Details on the additional analyses**

In the additional sensitivity analyses for the literature-based method, we sought to explore the impact of the following components in the literature-based method: 1) choice of risk factors, 2) different sources of RR estimates, and 3) different sources of exposure prevalence estimates.

1) To address how inclusion/exclusion of certain risk factors affects the population attributable risk (PAR) estimates, we included only the “convincing” factors (and cigarette smoking) and excluded the factors that have been defined as “probable” by the WCRF/AICR<sup>5</sup> from the calculation of PAR. To be specific, we calculated the proportion of CRC attributable to lifestyle factors excluding red meat, dietary fiber, and dietary

calcium, resulting in these 5 factors: physical activity, body fatness/BMI, alcoholic drinks, processed meat, and cigarette smoking.

2) To find the different sources of RRs, we performed searches in PubMed. Recent meta-analyses (published within 20 years) were the most preferred source of RRs, followed by large pooled analyses (or a review that summarized the literature). RRs had to provide the most relevant information to our study (e.g., sex-specific RRs); studies that reported RRs that matched our predefined exposure category levels were preferred. For each of the risk factors, we calculated PARs with different RRs and provided a range of PAR estimates (minimum PAR, maximum PAR) that could be obtained with more than one source of RR. In addition, we performed a sensitivity analysis with RRs stratified by countries to assess whether using US-specific RRs results in different PAR estimates compared to using worldwide RRs.

3) To assess how different sources of prevalence estimates change the PAR, we evaluated different prevalence estimates for the two factors: body fatness and cigarette smoking. Not enough information was provided on other factors. Prevalence estimates had to be sex-specific and nationally representative. In addition, the sources had to match the defined categories for BMI (normal, overweight, and obese) and cigarette smoking (never, former, and current).

## References

1. Islami F, Goding Sauer A, Miller KD, Siegel RL, Fedewa SA, Jacobs EJ, McCullough ML, Patel AV, Ma J, Soerjomataram I, Flanders WD, Brawley OW, et al. Proportion and number of cancer cases and deaths attributable to potentially modifiable risk factors in the United States. *CA: a cancer journal for clinicians* 2018;**68**: 31-54.
2. Moore SC, Lee IM, Weiderpass E, Campbell PT, Sampson JN, Kitahara CM, Keadle SK, Arem H, Berrington de Gonzalez A, Hartge P, Adami HO, Blair CK, et al. Association of Leisure-Time Physical Activity With Risk of 26 Types of Cancer in 1.44 Million Adults. *JAMA Intern Med* 2016;**176**: 816-25.
3. Xue K, Li FF, Chen YW, Zhou YH, He J. Body mass index and the risk of cancer in women compared with men: a meta-analysis of prospective cohort studies. *European journal of cancer prevention : the official journal of the European Cancer Prevention Organisation (ECP)* 2017;**26**: 94-105.
4. Bagnardi V, Rota M, Botteri E, Tramacere I, Islami F, Fedirko V, Scotti L, Jenab M, Turati F, Pasquali E, Pelucchi C, Galeone C, et al. Alcohol consumption and site-specific cancer risk: a comprehensive dose-response meta-analysis. *British journal of cancer* 2015;**112**: 580-93.
5. World Cancer Research Fund International/American Institute for Cancer Research, Continuous Update Project Report: Diet, Nutrition, Physical Activity and Colorectal Cancer, 2017.
6. Carter BD, Abnet CC, Feskanich D, Freedman ND, Hartge P, Lewis CE, Ockene JK, Prentice RL, Speizer FE, Thun MJ, Jacobs EJ. Smoking and mortality--beyond established causes. *N Engl J Med* 2015;**372**: 631-40.
7. Kyu HH, Bachman VF, Alexander LT, Mumford JE, Afshin A, Estep K, Veerman JL, Delwiche K, Iannarone ML, Moyer ML, Cercy K, Vos T, et al. Physical activity and risk of breast cancer, colon cancer, diabetes, ischemic heart disease, and ischemic stroke events: systematic review and dose-response meta-analysis for the Global Burden of Disease Study 2013. *BMJ (Clinical research ed)* 2016;**354**: i3857.
8. Calle EE, Kaaks R. Overweight, obesity and cancer: epidemiological evidence and proposed mechanisms. *Nature reviews Cancer* 2004;**4**: 579-91.
9. Moghaddam AA, Woodward M, Huxley R. Obesity and risk of colorectal cancer: a meta-analysis of 31 studies with 70,000 events. *Cancer epidemiology, biomarkers & prevention : a publication of the American Association for Cancer Research, cosponsored by the American Society of Preventive Oncology* 2007;**16**: 2533-47.
10. Fedirko V, Tramacere I, Bagnardi V, Rota M, Scotti L, Islami F, Negri E, Straif K, Romieu I, La Vecchia C, Boffetta P, Jenab M. Alcohol drinking and colorectal cancer risk: an overall and dose-response meta-analysis of published studies. *Annals of oncology : official journal of the European Society for Medical Oncology* 2011;**22**: 1958-72.
11. Zhao Z, Feng Q, Yin Z, Shuang J, Bai B, Yu P, Guo M, Zhao Q. Red and processed meat consumption and colorectal cancer risk: a systematic review and meta-analysis. *Oncotarget* 2017;**8**: 83306-14.
12. Aune D, Chan DS, Lau R, Vieira R, Greenwood DC, Kampman E, Norat T. Dietary fibre, whole grains, and risk of colorectal cancer: systematic review and dose-response meta-analysis of prospective studies. *BMJ (Clinical research ed)* 2011;**343**: d6617.
13. Keum N, Aune D, Greenwood DC, Ju W, Giovannucci EL. Calcium intake and colorectal cancer risk: dose-response meta-analysis of prospective observational studies. *International journal of cancer* 2014;**135**: 1940-8.
14. Liang PS, Chen TY, Giovannucci E. Cigarette smoking and colorectal cancer incidence and mortality: systematic review and meta-analysis. *International journal of cancer* 2009;**124**: 2406-15.
15. Ma Y, Yang Y, Wang F, Zhang P, Shi C, Zou Y, Qin H. Obesity and risk of colorectal cancer: a systematic review of prospective studies. *PloS one* 2013;**8**: e53916.
16. Stokes A, Preston SH. How smoking affects the proportion of deaths attributable to obesity: assessing the role of relative risks and weight distributions. *BMJ Open* 2016;**6**: e009232.
17. Siegel RL, Miller KD, Goding Sauer A, Fedewa SA, Butterly LF, Anderson JC, Cercek A, Smith RA, Jemal A. Colorectal cancer statistics, 2020. *CA: a cancer journal for clinicians* 2020.

18. Colditz GA, Manson JE, Hankinson SE. The Nurses' Health Study: 20-year contribution to the understanding of health among women. *J Womens Health* 1997;**6**: 49-62.

19. Rimm EB, Giovannucci EL, Willett WC, Colditz GA, Ascherio A, Rosner B, Stampfer MJ. Prospective study of alcohol consumption and risk of coronary disease in men. *Lancet* 1991;**338**: 464-8.
